# Supplementary material
Source: PubMed Central journal article supplement (PMC2926275)

## Posterior auditory channels

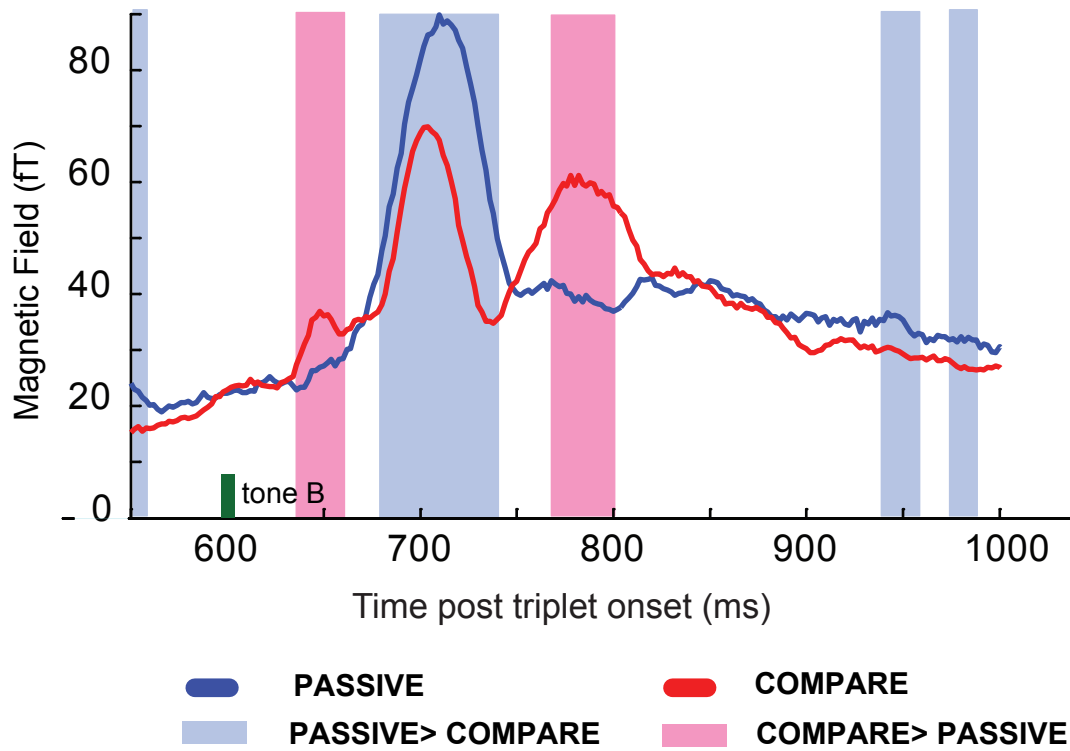

Supplement: NIHMS222798-supplement-01.pdf [file NIHMS222798-supplement-01.pdf]
